# Supplementary material
Source: MDPI journal article supplement (https://www.mdpi.com/2073-4441/15/16/2997)
Supplement: s1 [file s1]

## Supplementary Information

# Optimization of the Preparation Conditions of Aluminum-Impregnated Food Waste Biochar Using RSM with an MLP and Its Application in Phosphate Removal

Jin-Kyu Kang <sup>1,†</sup>, Khonekeo Kingkhambang <sup>2,†</sup>, Chang-Gu Lee <sup>3</sup> and Seong-Jik Park <sup>4,\*</sup>

<sup>1</sup> Institute for Environment and Energy, Pusan National University, Busan 46241, Republic of Korea; jinkyu.kang@pusan.ac.kr

<sup>2</sup> Department of Chemical Engineering, Hankyong National University, Anseong 17579, Republic of Korea; khonekeoit@yahoo.com

<sup>3</sup> Department of Environmental and Safety Engineering, Ajou University, Suwon 16499, Republic of Korea; changgu@ajou.ac.kr

<sup>4</sup> Department of Bioresources and Rural System Engineering, Hankyong National University, Anseong 17579, Republic of Korea

\* Correspondence: parkseongjik@hknu.ac.kr; Tel.: +82-670-5131

† These authors contributed equally to this work.

## 2. Material and methods

### 2.2. Response Surface Methodology (RSM) application for optimization of Al-FWB preparation condition for phosphate removal

$$X_i = \frac{x_i - \min(x_i)}{\max(x_i) - \min(x_i)} \quad (S1)$$

where  $X_i$  is the normalized input variable (-).  $x_i$  is the  $i$ th variable,  $\min(x_i)$  is the minimum value of variable  $x_i$ , and  $\max(x_i)$  is the maximum value of variable  $x_i$ .

### 2.5. Data analysis

For all experiments, the phosphate adsorption capacity was calculated using the following equation:

$$q_e = \frac{(C_i - C_e) \times V}{m} \quad (S2)$$

where  $C_i$  is the initial phosphate concentration,  $C_e$  is the residual phosphate concentration after adsorption,  $V$  is the volume of the solution (L), and  $m$  is the amount of the adsorbent (g).

The adsorption mechanisms were explored using kinetics-based pseudo-first- and pseudo-second-order models. The following equations describe pseudo-first- and second-order kinetic models [81,82]:

$$q_t = q_e(1 - e^{-k_1 t}) \quad (S3)$$

$$q_t = \frac{k_2 q_e^2 t}{1 + k_2 q_e t} \quad (S4)$$

where  $k_1$  (1/h) and  $k_2$  (g/mg/h) are the pseudo-first-order and pseudo-second-order rate constants, respectively.

The Langmuir and Freundlich models were used to analyze the adsorption equilibrium data, and the isotherm equations were as follows [83,84]:

$$q_e = \frac{Q_m K_L C_e}{1 + K_L C_e} \quad (S5)$$

$$q_e = K_F C_e^{\frac{1}{n}} \quad (S6)$$

where  $Q_m$  (mg/g) is the maximum phosphate adsorption capacity of the adsorbent,  $K_L$  is the Langmuir constant related to adsorption energy,  $K_F$  ( $\text{mg g}^{-1}(\text{mg L}^{-1})^{-1/n}$ ) is the Freundlich constant, and  $n$  (-) is the adsorption intensity.

The thermodynamic parameters were calculated using the following equation [85,86]:

$$\Delta G^0 = -RT \ln (K_e) \quad (S7)$$

$$\ln(K_e) = \frac{\Delta S^0}{R} - \frac{\Delta H^0}{RT} \quad (S8)$$

$$K_e = \frac{aq_e}{C_e} \quad (S9)$$

where  $\Delta G^0$  is the standard Gibbs free energy,  $\Delta S^0$  is the entropy change,  $\Delta H^0$  is the enthalpy change,  $a$  is the adsorbent dosage (g/L),  $q_e$  is the maximum amount adsorbed (mg/g),  $T$  is the absolute temperature (K), and  $R$  is the universal gas constant (8.314 J/mol·K).  $\Delta H^0$  and  $\Delta S^0$  were calculated using the slope and intercept of the van't Hoff plot of  $1/T$  vs.  $\ln(aq_e/C_e)$  [87].

**Table S1.** Ranges of hyperparameters of multi-layer perceptron for grid-search and selected values of hyperparameters (using sklearn library, by 5 folds cross validation).

| Hyperparameters           | Range                | Selected value  |
|---------------------------|----------------------|-----------------|
| <b>hidden_layer_sizes</b> | 10, 20, 30           | <b>30</b>       |
| <b>activation</b>         | relu, logistic, tanh | <b>tanh</b>     |
| <b>learning_rate</b>      | constant, adaptive   | <b>constant</b> |
| <b>solver</b>             | adam, lbfgs, sgd     | <b>lbfgs</b>    |
| <b>Alpha</b>              | 0.0001, 0.001, 0.01  | <b>0.01</b>     |
| <b>max_iter</b>           | 500, 1000            | <b>500</b>      |

**Table S2.** Analysis of variance and equation of the all term included quadratic equation for predicting the phosphate removal rate of Al-FWB prepared using Box-Behnken designed conditions.

| Source                                                                                                                                    | Sum of squares       | Degree of freedom | Mean square          | F-value | p-value<br>prob > F |
|-------------------------------------------------------------------------------------------------------------------------------------------|----------------------|-------------------|----------------------|---------|---------------------|
| Model                                                                                                                                     | 0.041                | 9                 | 4.5×10 <sup>-3</sup> | 10.23   | 0.0029              |
| X <sub>1</sub>                                                                                                                            | 0.019                | 1                 | 0.019                | 43.46   | 0.0003              |
| X <sub>2</sub>                                                                                                                            | 2.8×10 <sup>-4</sup> | 1                 | 2.8×10 <sup>-4</sup> | 0.63    | 0.4527              |
| X <sub>3</sub>                                                                                                                            | 7.0×10 <sup>-3</sup> | 1                 | 7.0×10 <sup>-3</sup> | 15.89   | 0.0053              |
| X <sub>1</sub> X <sub>2</sub>                                                                                                             | 5.6×10 <sup>-5</sup> | 1                 | 5.6×10 <sup>-5</sup> | 0.13    | 0.7316              |
| X <sub>1</sub> X <sub>3</sub>                                                                                                             | 3.9×10 <sup>-3</sup> | 1                 | 3.9×10 <sup>-3</sup> | 8.75    | 0.0211              |
| X <sub>2</sub> X <sub>3</sub>                                                                                                             | 4.7×10 <sup>-4</sup> | 1                 | 4.7×10 <sup>-4</sup> | 1.06    | 0.3373              |
| X <sub>1</sub> <sup>2</sup>                                                                                                               | 9.2×10 <sup>-3</sup> | 1                 | 9.2×10 <sup>-3</sup> | 20.85   | 0.0026              |
| X <sub>2</sub> <sup>2</sup>                                                                                                               | 2.4×10 <sup>-4</sup> | 1                 | 2.4×10 <sup>-4</sup> | 0.55    | 0.4816              |
| X <sub>3</sub> <sup>2</sup>                                                                                                               | 3.7×10 <sup>-5</sup> | 1                 | 3.7×10 <sup>-5</sup> | 0.083   | 0.7814              |
| Residual                                                                                                                                  | 3.1×10 <sup>-3</sup> | 7                 | 4.4×10 <sup>-4</sup> |         |                     |
| Lack of fit                                                                                                                               | 3.0×10 <sup>-3</sup> | 3                 | 1.0×10 <sup>-3</sup> | 41.60   | 0.0018              |
| Pure Error                                                                                                                                | 9.6×10 <sup>-5</sup> | 4                 | 2.4×10 <sup>-5</sup> |         |                     |
| Total                                                                                                                                     | 0.044                | 16                |                      |         |                     |
| Equation: $Y = 0.71 - 0.049X_1 - 0.0059X_2 + 0.030X_3 - 0.0038X_1X_2 - 0.031X_1X_3 - 0.011X_2X_3 + 0.047X_1^2 + 0.0076X_2^2 + 0.030X_3^2$ |                      |                   |                      |         |                     |

**Table S3.** Modeling statistics from the analysis of variance of the optimized quadratic equation used in predicting the phosphate removal rate of Al-FWB prepared using Box-Behnken designed conditions.

| <b>Parameters</b>                               | <b>Value</b> | <b>Parameters</b>              | <b>Value</b> |
|-------------------------------------------------|--------------|--------------------------------|--------------|
| <b>Square root of the residual mean square</b>  | 0.019        | <b>R<sup>2</sup></b>           | 0.904        |
| <b>Overall average of all the response data</b> | 0.74         | <b>Adjusted R<sup>2</sup></b>  | 0.872        |
| <b>Coefficient of variation</b>                 | 2.54         | <b>Predicted R<sup>2</sup></b> | 0.776        |
| <b>Predicted residual error sum of squares</b>  | 9.83E-3      | <b>Adequate precision</b>      | 18.4         |

**Table S4.** Values of parameters determined from fitting the adsorption data of phosphate removal using Opt-Al-FWB to kinetic models.

| <b>Models</b>     | <b>Pseudo-first order</b> |             |                      | <b>Pseudo-second order</b> |                |                      |
|-------------------|---------------------------|-------------|----------------------|----------------------------|----------------|----------------------|
| <b>Parameters</b> | $q_e$ (mg/g)              | $k_1$ (1/h) | <b>R<sup>2</sup></b> | $q_e$ (mg/g)               | $k_2$ (g/mg/h) | <b>R<sup>2</sup></b> |
| Values            | 126.5                     | 4.05        | 0.983                | 130.0                      | 0.078          | 0.993                |

**Table S5.** Values of parameters of equilibrium models for phosphate adsorption using Opt-Al-FWB.

| Models     | Langmuir     |              |       | Freundlich  |       |       |
|------------|--------------|--------------|-------|-------------|-------|-------|
| Parameters | $Q_m$ (mg/g) | $K_L$ (L/mg) | $R^2$ | $K_F$ (L/g) | $1/n$ | $R^2$ |
| Values     | 197.8        | 0.039        | 0.982 | 30.22       | 0.369 | 0.995 |



**Table S6.** Values of thermodynamic parameters for phosphate removal using Opt-Al-FWB (initial concentration: 500 mg/L, adsorbent dosage: 3.33 g/L, reaction time: 24 h).

| Temperature | $\Delta H^0$ | $\Delta S^0$ | $\Delta G^0$ |
|-------------|--------------|--------------|--------------|
| (°C)        | (kJ/mol)     | (J/mol·K)    | (kJ/mol)     |
| 15          | 19.6         | 83.4         | -4.4         |
| 25          |              |              | -5.2         |
| 35          |              |              | -6.0         |

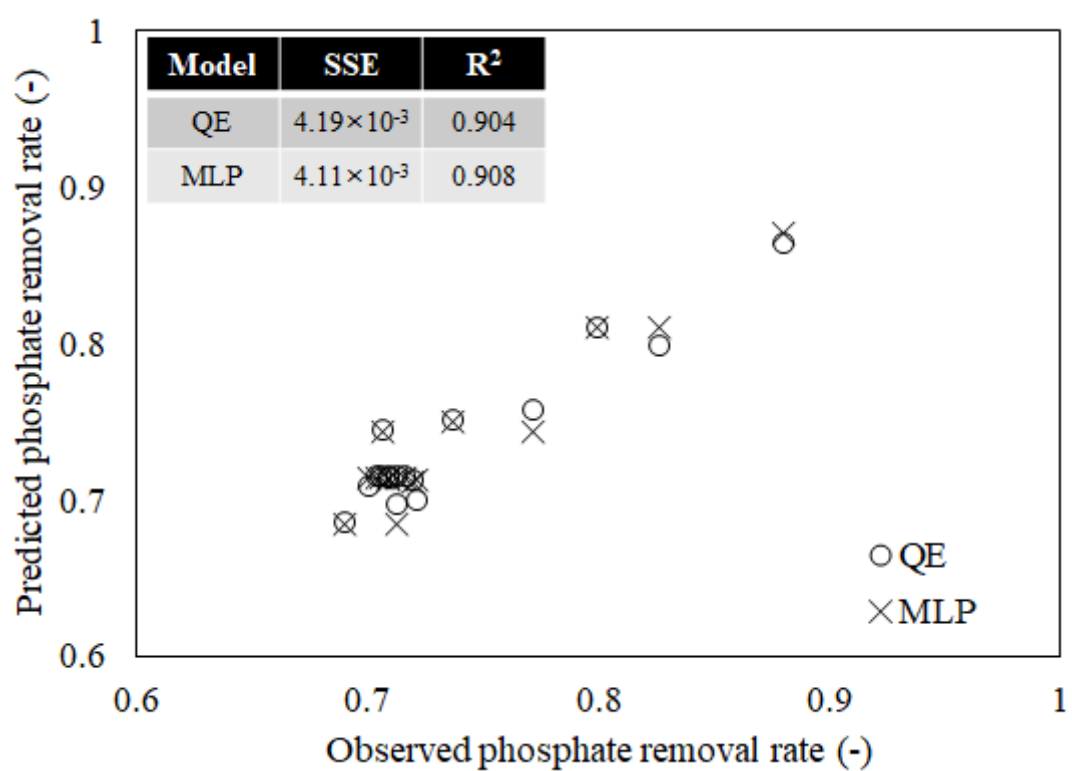

**Figure S1.** Pair plot, SSE, and R<sup>2</sup> for 17 datasets by quadratic equation (QE) and multi-layer perceptron (MLP).
